# Supplementary material
Source: publisher figshare collection journal article supplement (https://karger.figshare.com/ndownloader/files/15550226)
Supplement: Supplementary file 1 [file 15550226]

PAR2 and heat loss in aged skin

Supplementary Table 1 Individual aural canal temperature values

|                             | Resting |      | End Exercise | End Recovery |
|-----------------------------|---------|------|--------------|--------------|
|                             | 25°C    | 40°C |              |              |
|                             | 36.8    | 37.1 | 37.7         | 37.1         |
|                             | 36.6    | 37.0 | 37.8         | 37.1         |
|                             | 36.6    | 37.1 | 38.7         | 38.0         |
|                             | 36.5    | 37.6 | 38.2         | 37.3         |
| Aural canal temperature, °C | 36.5    | 37.0 | 37.8         | 37.2         |
|                             | 36.5    | 37.3 | 37.6         | 37.1         |
|                             | 36.7    | 37.1 | 38.0         | 37.3         |
|                             | 36.6    | 36.9 | 38.3         | 37.4         |
|                             | 36.6    | 36.8 | 37.6         | 37.1         |

End Exercise, end of 50 min exercise at a fixed rate of heat production of  $200 \text{ W}\cdot\text{min}^{-2}$ ; End Recovery, end of 30-min postexercise recovery; bpm, beats per minute. Aural canal temperature values were obtained by averaging values over the last 5 min of the corresponding time period.

PAR2 and heat loss in aged skin

Supplementary Table 2 Individual mean skin temperature values

|                                   | Resting |      | End Exercise | End Recovery |
|-----------------------------------|---------|------|--------------|--------------|
|                                   | 25°C    | 40°C |              |              |
| Mean skin temperature, °C (n = 8) | 31.8    | 35.5 | 36.4         | 35.7         |
|                                   | 31.9    | 34.6 | 36.7         | 36.1         |
|                                   | 32.2    | 34.7 | 36.7         | 36.6         |
|                                   | 31.8    | 35.5 | 36.4         | 35.7         |
|                                   | 31.4    | 34.6 | 35.9         | 34.9         |
|                                   | 32.0    | 34.6 | 35.4         | 34.8         |
|                                   | 32.1    | 34.7 | 36.0         | 34.6         |
|                                   | 32.0    | 35.4 | 36.2         | 35.3         |

End Exercise, end of 50 min exercise at a fixed rate of heat production of 200 W·min<sup>-2</sup>; End Recovery, end of 30-min postexercise recovery. Mean skin temperature values were obtained by averaging values over the last 5 min of the corresponding time period.

PAR2 and heat loss in aged skin

Supplementary Table 3 Individual mean body temperature values

|                                   | Resting |      | End Exercise | End Recovery |
|-----------------------------------|---------|------|--------------|--------------|
|                                   | 25°C    | 40°C |              |              |
| Mean body temperature, °C (n = 8) | 36.1    | 36.8 | 37.7         | 37.0         |
|                                   | 36.1    | 36.9 | 38.5         | 37.8         |
|                                   | 36.1    | 37.3 | 38.0         | 37.2         |
|                                   | 36.0    | 36.8 | 37.7         | 37.0         |
|                                   | 36.0    | 37.0 | 37.4         | 36.9         |
|                                   | 36.2    | 36.8 | 37.7         | 37.1         |
|                                   | 36.2    | 36.7 | 38.1         | 37.1         |
|                                   | 36.1    | 36.7 | 37.5         | 36.9         |

End Exercise, end of 50 min exercise at a fixed rate of heat production of 200 W·min<sup>-2</sup>; End Recovery, end of 30-min postexercise recovery. Mean body temperature values were obtained by averaging values over the last 5 min of the corresponding time period.

PAR2 and heat loss in aged skin

Supplementary Table 4 Individual heart rate values

|                 | Resting |      | End Exercise | End Recovery |
|-----------------|---------|------|--------------|--------------|
|                 | 25°C    | 40°C |              |              |
| Heart rate, bpm | 54      | 56   | 99           | 74           |
|                 | 67      | 82   | 119          | 82           |
|                 | 64      | 66   | 157          | 111          |
|                 | 72      | 108  | 143          | 103          |
|                 | 67      | 81   | 129          | 86           |
|                 | 59      | 59   | 117          | 76           |
|                 | 59      | 68   | 113          | 87           |
|                 | 55      | 64   | 116          | 76           |
|                 | 51      | 61   | 105          | 81           |

End Exercise, end of 50 min exercise at a fixed rate of heat production of  $200 \text{ W}\cdot\text{min}^{-2}$ ; End Recovery, end of 30-min postexercise recovery; bpm, beats per minute. Heart rate values were obtained by averaging values over the last 5 min of the corresponding time period.

PAR2 and heat loss in aged skin

Supplementary Table 5 Individual mean arterial pressure values

|                              | Resting |      | End Exercise | End Recovery |
|------------------------------|---------|------|--------------|--------------|
|                              | 25°C    | 40°C |              |              |
|                              | 99      | 103  | 106          | 83           |
|                              | 89      | 102  | 104          | 94           |
|                              | 92      | 99   | 107          | 80           |
|                              | 83      | 84   | 96           | 76           |
| Mean arterial pressure, mmHg | 91      | 95   | 101          | 82           |
|                              | 90      | 91   | 104          | 89           |
|                              | 95      | 96   | 120          | 93           |
|                              | 95      | 96   | 105          | 89           |
|                              | 99      | 105  | 105          | 83           |

End Exercise, end of 50 min exercise at a fixed rate of heat production of  $200 \text{ W}\cdot\text{min}^{-2}$ ; End Recovery, end of 30-min postexercise recovery. Mean arterial pressure values were obtained by averaging values over the last 5 min of the corresponding time period.
